# Supplementary material
Source: PubMed Central journal article supplement (PMC4711397)
Supplement: NIHMS743950-supplement-01.pdf [file NIHMS743950-supplement-01.pdf]

**Supplemental Table 1: Abcg2-Cre Mice with Rosa-LacZ reporter:**

| Animal ID | Genotype                                               | Age at Tam (weeks) | Gender | Analysis after Tam-treatment (months) |
|-----------|--------------------------------------------------------|--------------------|--------|---------------------------------------|
| 1937      | Abcg2 <sup>Cre/+</sup> , Rosa26 <sup>LacZ/+</sup>      | 8                  | M      | 1                                     |
| 4591      | Abcg2 <sup>Cre/Cre</sup> , Rosa26 <sup>LacZ/+</sup>    | 8                  | M      | 1                                     |
| 1670      | Abcg2 <sup>Cre/Cre</sup> , Rosa26 <sup>LacZ/+</sup>    | 8                  | F      | 2                                     |
| 1686      | Abcg2 <sup>Cre/Cre</sup> , Rosa26 <sup>LacZ/+</sup>    | 8                  | F      | 3.5                                   |
| 1669      | Abcg2 <sup>Cre/Cre</sup> , Rosa26 <sup>LacZ/+</sup>    | 8                  | M      | 4                                     |
| 2375      | Abcg2 <sup>Cre/Cre</sup> , Rosa26 <sup>LacZ/+</sup>    | 8                  | M      | 9                                     |
| 34440     | Abcg2 <sup>Cre/Cre</sup> , Rosa26 <sup>LacZ/+</sup>    | 8                  | F      | 9                                     |
| 2345      | Abcg2 <sup>Cre/Cre</sup> , Rosa26 <sup>LacZ/+</sup>    | 8                  | M      | 20                                    |
| 2347      | Abcg2 <sup>Cre/Cre</sup> , Rosa26 <sup>LacZ/+</sup>    | 8                  | M      | 20                                    |
| 5798      | Abcg2 <sup>Cre/Cre</sup> , Rosa26 <sup>LacZ/LacZ</sup> | 3                  | F      | 21                                    |
| 5920      | Abcg2 <sup>Cre/Cre</sup> , Rosa26 <sup>LacZ/LacZ</sup> | 8                  | F      | 15                                    |
| 5929      | Abcg2 <sup>Cre/Cre</sup> , Rosa26 <sup>LacZ/LacZ</sup> | 8                  | M      | 15                                    |
| 5859      | Abcg2 <sup>Cre/Cre</sup> , Rosa26 <sup>LacZ/LacZ</sup> | 8                  | M      | 15                                    |
| 5901      | Abcg2 <sup>Cre/Cre</sup> , Rosa26 <sup>LacZ/LacZ</sup> | 8                  | M      | 15                                    |
| 5903      | Abcg2 <sup>Cre/Cre</sup> , Rosa26 <sup>LacZ/LacZ</sup> | 8                  | M      | 15                                    |
| 2665      | Abcg2 <sup>Cre/Cre</sup> , Rosa26 <sup>LacZ/LacZ</sup> | 8                  | M      | 1.5                                   |
| 2657      | Abcg2 <sup>Cre/Cre</sup> , Rosa26 <sup>LacZ/LacZ</sup> | 8                  | M      | 1.5                                   |
| 1641      | Abcg2 <sup>Cre/+</sup> , Rosa26 <sup>LacZ/+</sup>      | No Tam             | M      | No Tam                                |
| 1633      | Abcg2 <sup>Cre/+</sup> , Rosa26 <sup>LacZ/+</sup>      | No Tam             | M      | No Tam                                |
| 3435      | Abcg2 <sup>Cre/+</sup> , Rosa26 <sup>LacZ/+</sup>      | No Tam             | M      | No Tam                                |

**Supplemental Table 2: Abcg2-Cre Mice with Rosa-EYFP reporter:**

| Mouse ID | Genotype                                               | Age at Tam (Weeks) | Gender | Analysis after Tam-treatment (months) |
|----------|--------------------------------------------------------|--------------------|--------|---------------------------------------|
| 5961     | Abcg2 <sup>Cre/+</sup> , Rosa26 <sup>EYFP/+</sup>      | 8                  | M      | 1                                     |
| 5362     | Abcg2 <sup>Cre/+</sup> , Rosa26 <sup>EYFP/+</sup>      | 2                  | F      | 22                                    |
| 5843     | Abcg2 <sup>Cre/+</sup> , Rosa26 <sup>EYFP/+</sup>      | 8                  | M      | 0.5                                   |
| 5811     | Abcg2 <sup>Cre/+</sup> , Rosa26 <sup>EYFP/+</sup>      | 11                 | M      | 17                                    |
| 5817     | Abcg2 <sup>Cre/+</sup> , Rosa26 <sup>EYFP/+</sup>      | 11                 | M      | 17                                    |
| 1849     | Abcg2 <sup>Cre/+</sup> , Rosa26 <sup>EYFP/+</sup>      | 20                 | M      | 12                                    |
| 1851     | Abcg2 <sup>Cre/+</sup> , Rosa26 <sup>EYFP/+</sup>      | 20                 | M      | 12                                    |
| 1801     | Abcg2 <sup>Cre/+</sup> , Rosa26 <sup>EYFP/+</sup>      | 12                 | M      | 12                                    |
| 1803     | Abcg2 <sup>Cre/+</sup> , Rosa26 <sup>EYFP/+</sup>      | 12                 | M      | 12                                    |
| 1861     | Abcg2 <sup>Cre/+</sup> , Rosa26 <sup>EYFP/+</sup>      | 4                  | M      | 12                                    |
| 1863     | Abcg2 <sup>Cre/+</sup> , Rosa26 <sup>EYFP/+</sup>      | 4                  | M      | 12                                    |
| 1865     | Abcg2 <sup>Cre/+</sup> , Rosa26 <sup>EYFP/+</sup>      | 4                  | M      | 12                                    |
| 1867     | Abcg2 <sup>Cre/+</sup> , Rosa26 <sup>EYFP/+</sup>      | 4                  | M      | 12                                    |
| 8118     | Abcg2 <sup>Cre/+</sup> , Rosa26 <sup>EYFP/+</sup>      | 4                  | F      | 12                                    |
| 8120     | Abcg2 <sup>Cre/+</sup> , Rosa26 <sup>EYFP/+</sup>      | 4                  | F      | 12                                    |
| 8130     | Abcg2 <sup>Cre/+</sup> , Rosa26 <sup>EYFP/+</sup>      | 4                  | F      | 12                                    |
| 8136     | Abcg2 <sup>Cre/+</sup> , Rosa26 <sup>EYFP/+</sup>      | 4                  | F      | 12                                    |
| 5359     | Abcg2 <sup>Cre/+</sup> , Rosa26 <sup>EYFP/+</sup>      | 2                  | M      | 34                                    |
| 1956     | Abcg2 <sup>Cre/+</sup> , Rosa26 <sup>EYFP/+</sup>      | 12                 | F      | 4                                     |
| 3705     | Abcg2 <sup>Cre/Cre</sup> , Rosa26 <sup>EYFP/EYFP</sup> | 5                  | M      | 4                                     |
| 3707     | Abcg2 <sup>Cre/Cre</sup> , Rosa26 <sup>EYFP/EYFP</sup> | 5                  | M      | 4                                     |
| 3709     | Abcg2 <sup>Cre/Cre</sup> , Rosa26 <sup>EYFP/EYFP</sup> | 5                  | M      | 4                                     |
| 3731     | Abcg2 <sup>Cre/Cre</sup> , Rosa26 <sup>EYFP/EYFP</sup> | 6                  | M      | 1                                     |
| 3733     | Abcg2 <sup>Cre/Cre</sup> , Rosa26 <sup>EYFP/EYFP</sup> | 6                  | M      | 1                                     |
| 3735     | Abcg2 <sup>Cre/Cre</sup> , Rosa26 <sup>EYFP/EYFP</sup> | 6                  | M      | 1                                     |
| 3737     | Abcg2 <sup>Cre/Cre</sup> , Rosa26 <sup>EYFP/EYFP</sup> | 6                  | M      | 1                                     |
| 2843     | Abcg2 <sup>Cre/Cre</sup> , Rosa26 <sup>EYFP/EYFP</sup> | 6                  | M      | 1                                     |
| 2845     | Abcg2 <sup>Cre/Cre</sup> , Rosa26 <sup>EYFP/EYFP</sup> | 6                  | M      | 1                                     |
| 8139     | Abcg2 <sup>Cre/+</sup> , Rosa26 <sup>EYFP/+</sup>      | No Tam             | M      | No Tam                                |
| 3961     | Abcg2 <sup>Cre/Cre</sup> , Rosa26 <sup>EYFP/EYFP</sup> | No Tam             | M      | No Tam                                |

Suppl. Fig 1A: Co-staining of Abcg2 and CreERT2 in skeletal muscle extralaminar cells

Skeletal Muscle 3777  
Abcg2<sup>Cre/Cre</sup>

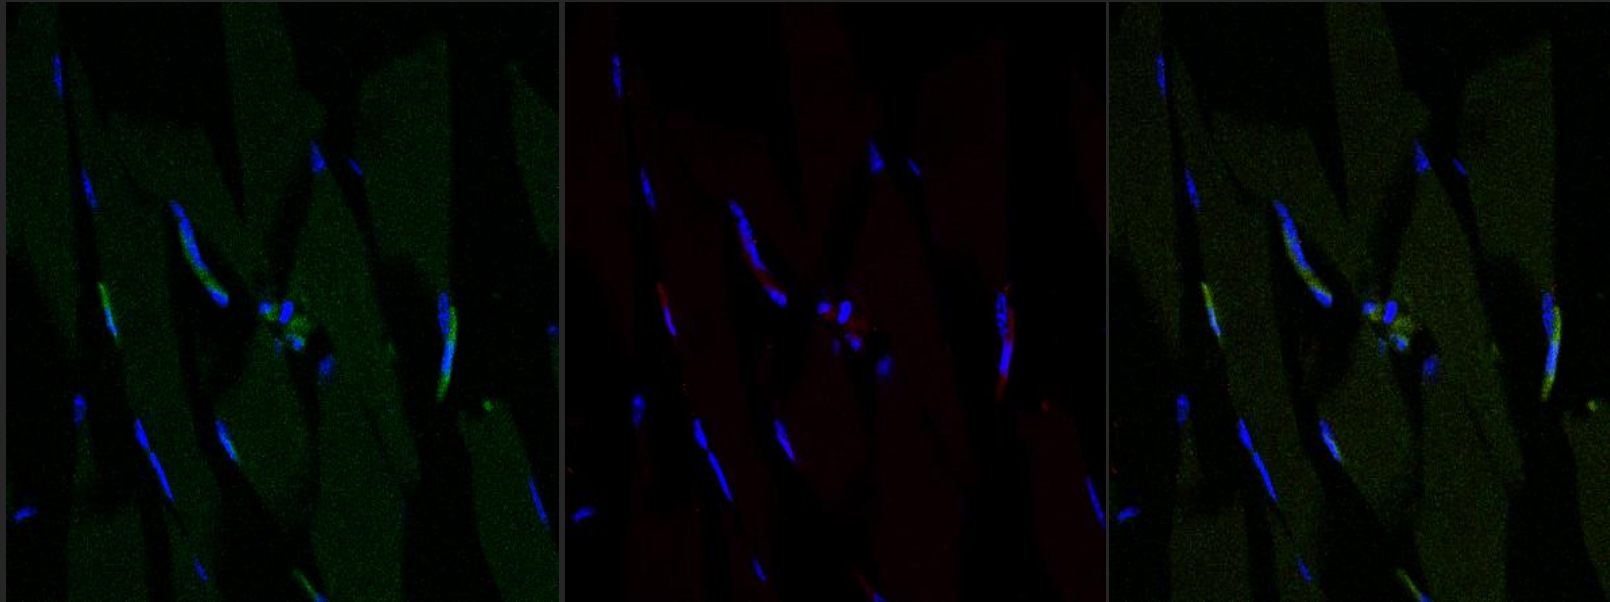

Abcg2+DAPI

Cre+DAPI

Abcg2+Cre+DAPI

40X

Skeletal muscle sections were stained with antibodies to Abcg2 and Cre and analyzed by confocal immunofluorescent microscopy. This analysis shows that extralaminar cells co-express both proteins in a homozygous Abcg2<sup>CreERT2/CreERT2</sup> mouse

# Suppl. Fig 1B: Western blot analysis of Abcg2 protein levels in the liver and kidney of a wildtype and Abcg2<sup>Cre/Cre</sup> homozygous mouse

1  
2  
3  
4  
5  
6  
7  
8  
9  
10  
11  
12  
13  
14  
15  
16  
17  
18  
19  
20  
21  
22  
23  
24  
25  
26  
27  
28  
29  
30  
31  
32  
33  
34  
35  
36  
37  
38  
39  
40  
41  
42  
43

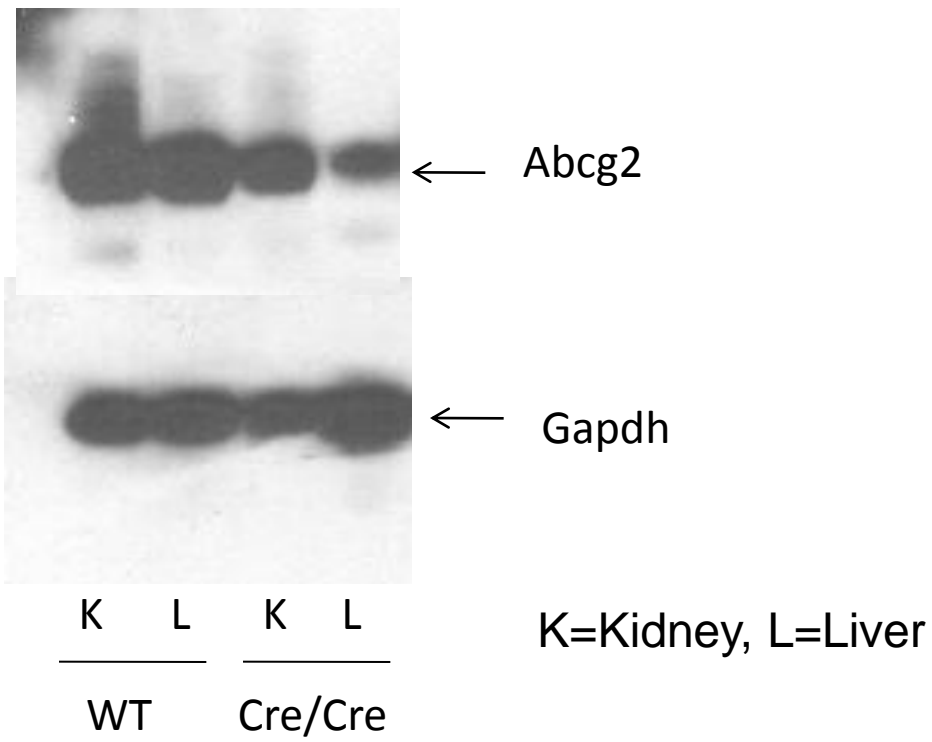

Kidney and liver from wild-type and *Abcg2*<sup>CreERT2/CreERT2</sup> homozygous mice were harvested. Lysates were prepared from tissues using M-PER mammalian protein extraction reagent (68501 Pierce, USA) together with Complete Mini EDTA-free Protein Inhibitor Cocktail (04693159001 Roche, USA). Tissue homogenates (10 ug protein per lane) were electrophoretically separated on 4% to 12% Bis-Tris NuPAGE gels (Invitrogen, USA), transferred to polyvinylidene fluoride membranes (Invitrogen, USA), and detected using a rat-monoclonal antibody to *Abcg2* (BXP53, MC-981 Kamiya Biomedical Company, USA) at a dilution of 1:5,000. Antibodies to GAPDH (1:50,000; MAB374 Millipore, USA) were used as control for protein loading. Protein bands were visualized by ECL Plus Western Blotting Detection System (RPN2132, GE Healthcare, USA) using the protocol supplied by the manufacturer.

1  
2  
3  
4  
5  
6  
7  
8  
9  
10  
11  
12  
13  
14  
15  
16  
17  
18  
19  
20  
21  
22  
23  
24  
25  
26  
27  
28  
29  
30  
31  
32  
33  
34  
35  
36  
37  
38  
39  
40  
41  
42  
43

10X

20X

40X

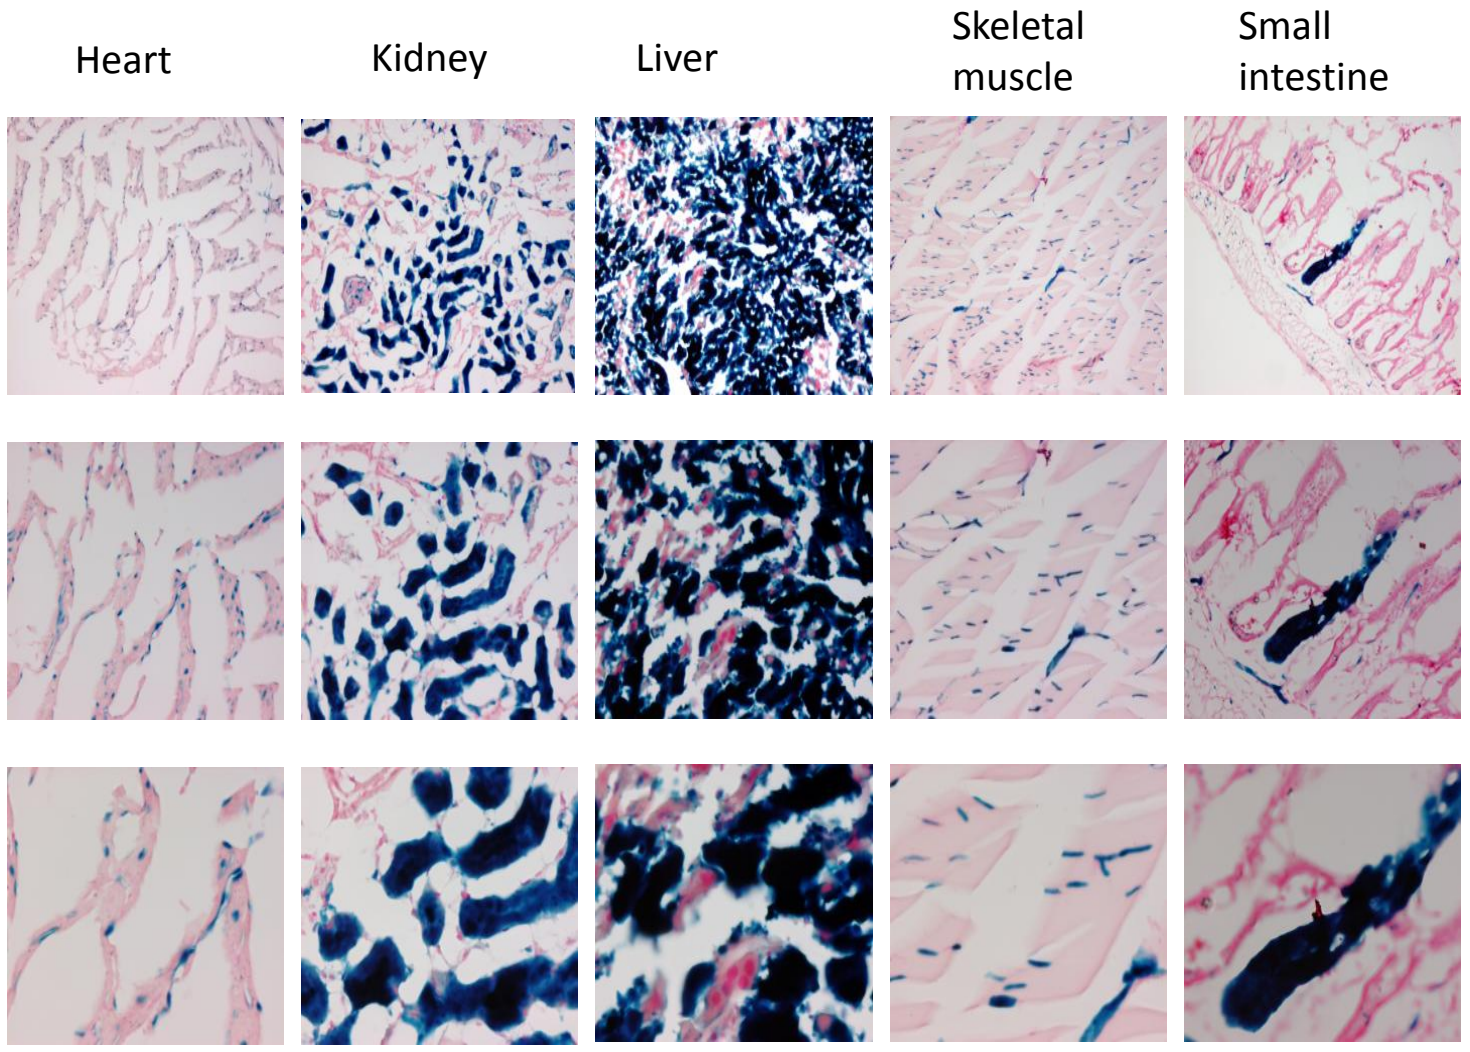



# Suppl. Fig 3: 5920 Abcg2<sup>Cre/Cre</sup> Rosa26<sup>LacZ/LacZ</sup> -15 mo post-Tam

1  
2  
3  
4  
5  
6  
7  
8  
9  
10  
11  
12  
13  
14  
15  
16  
17  
18  
19  
20  
21  
22  
23  
24  
25  
26  
27  
28  
29  
30  
31  
32  
33  
34  
35  
36  
37  
38  
39  
40  
41  
42  
43

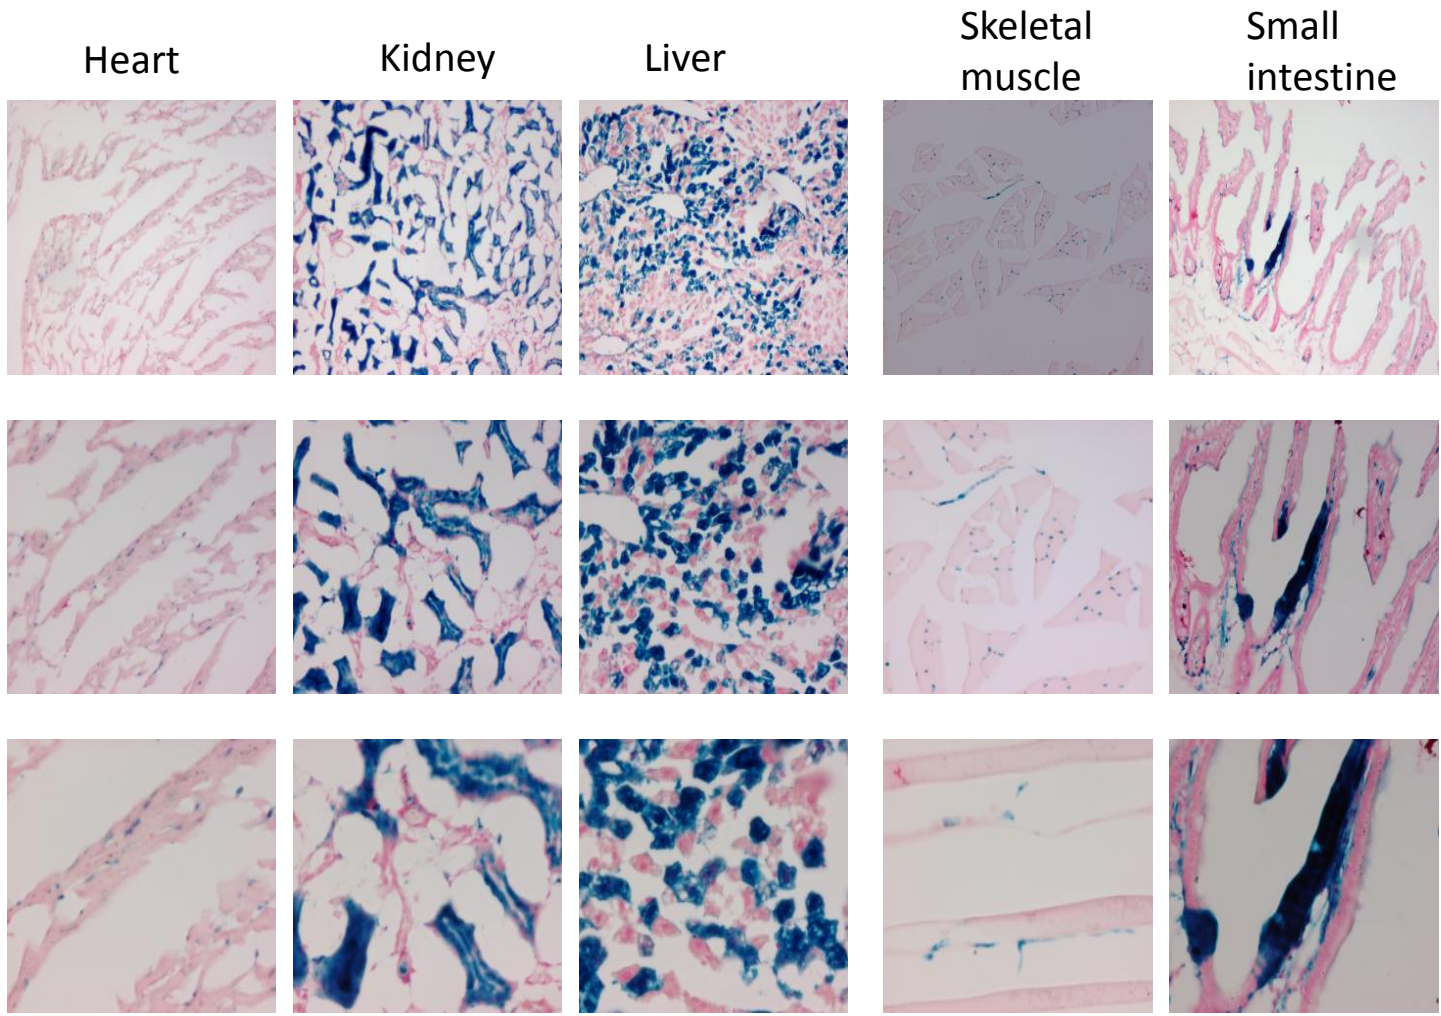

1  
2  
3  
4  
5  
6  
7  
8  
9  
10  
11  
12  
13  
14  
15  
16  
17  
18  
19  
20  
21  
22  
23  
24  
25  
26  
27  
28  
29  
30  
31  
32  
33  
34  
35  
36  
37  
38  
39  
40  
41  
42  
43

Heart

Kidney

Liver

Skeletal muscle

Small intestine

10X

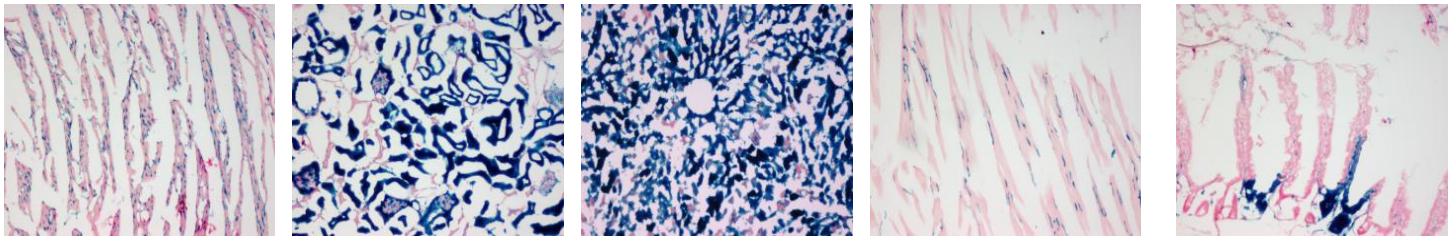

20X

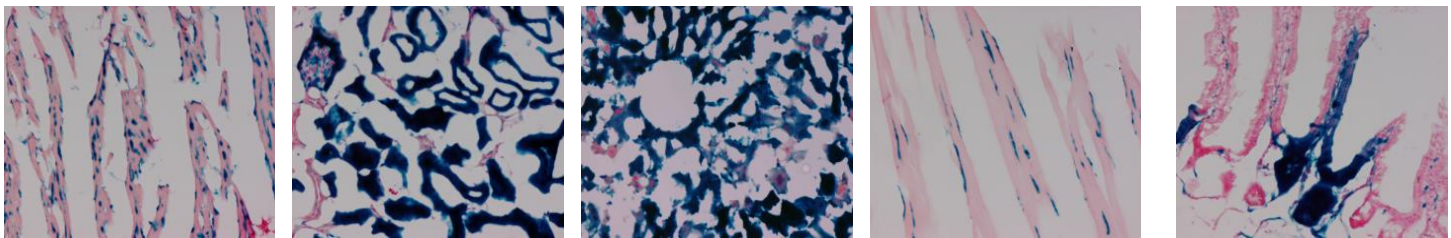

40X

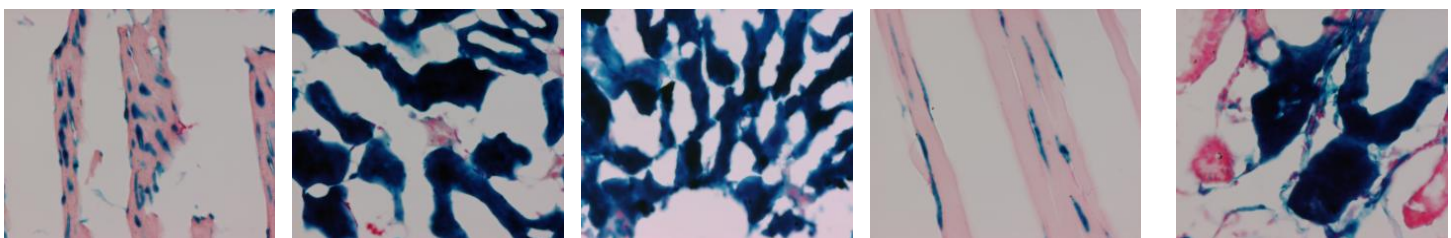

Testis

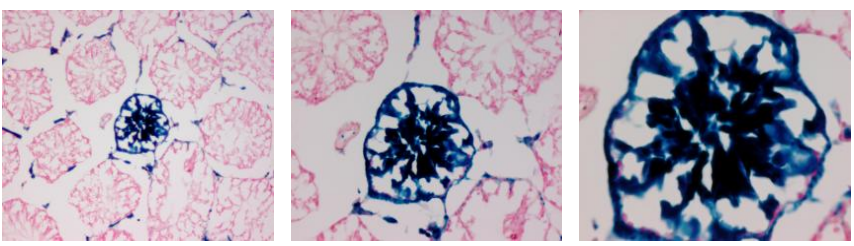

10X

20X

40X



# Suppl. Fig 5: 5859 *Abcg2*<sup>Cre/Cre</sup> *Rosa26*<sup>LacZ/LacZ</sup> – 15 mo post-Tam

1  
2  
3  
4  
5  
6  
7  
8  
9  
10  
11  
12  
13  
14  
15  
16  
17  
18  
19  
20  
21  
22  
23  
24  
25  
26  
27  
28  
29  
30  
31  
32  
33  
34  
35  
36  
37  
38  
39  
40  
41  
42  
43

Heart

Kidney

Liver

Skeletal muscle

Small intestine

10X

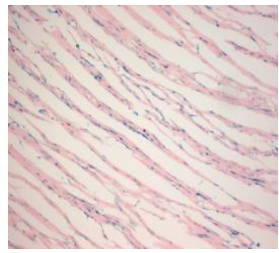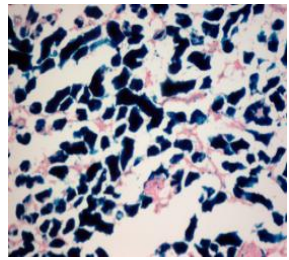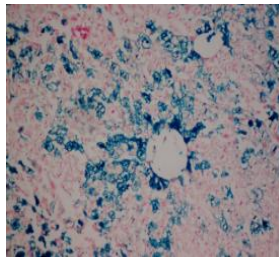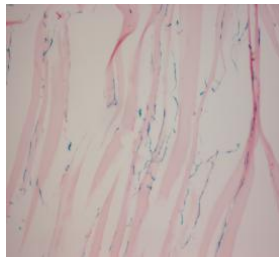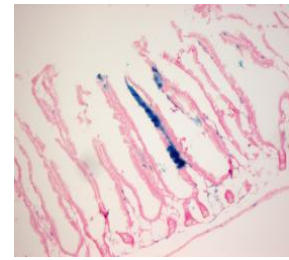

20X

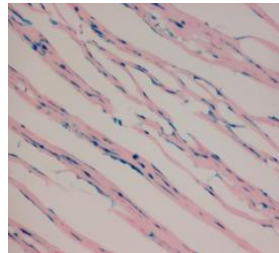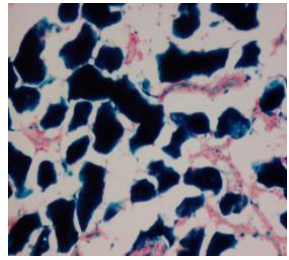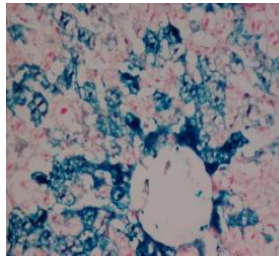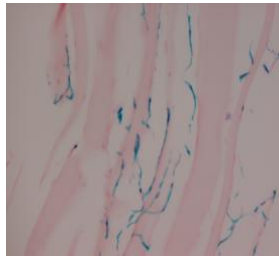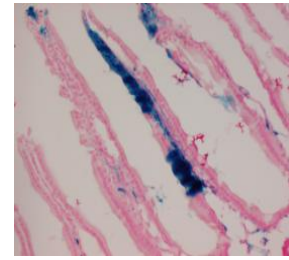

40X

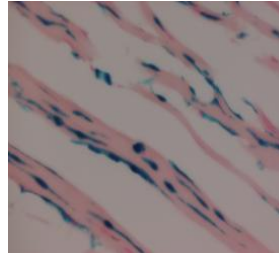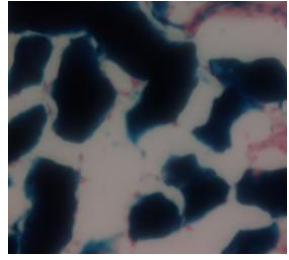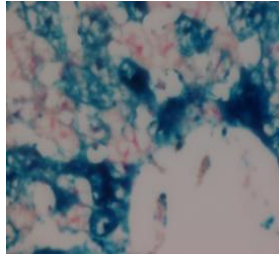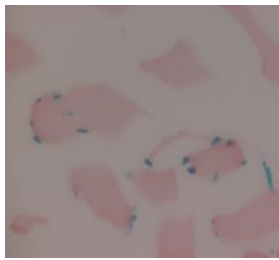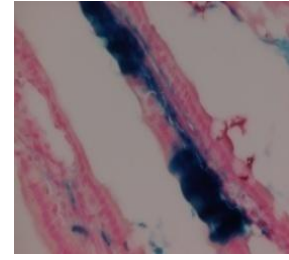

Testis

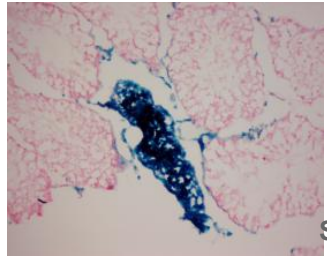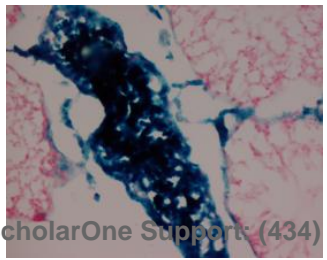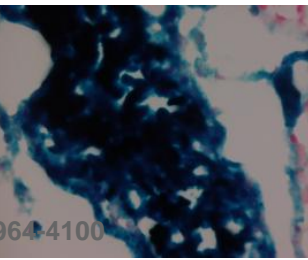

10X

20X

40X



1  
2  
3  
4  
5  
6  
7  
8  
9  
10  
11  
12  
13  
14  
15  
16  
17  
18  
19  
20  
21  
22  
23  
24  
25  
26  
27  
28  
29  
30  
31  
32  
33  
34  
35  
36  
37  
38  
39  
40  
41  
42  
43

Heart

Kidney

Liver

Skeletal muscle

Small intestine

10X

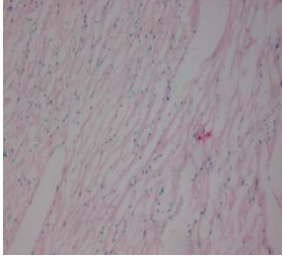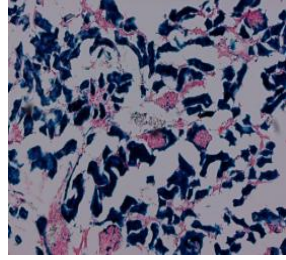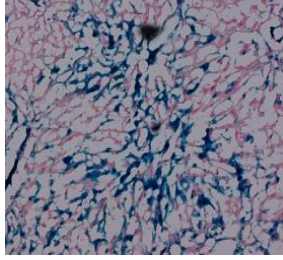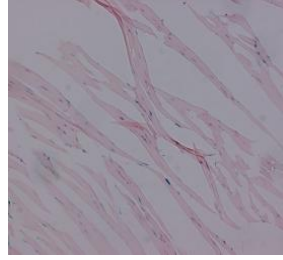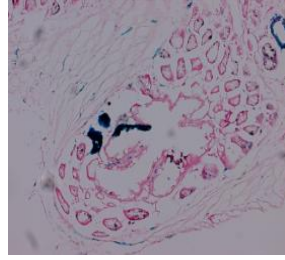

20X

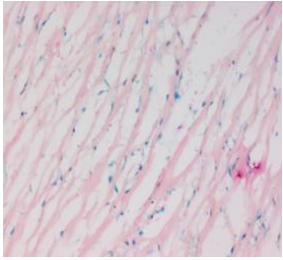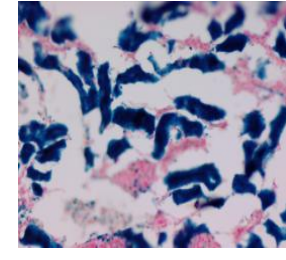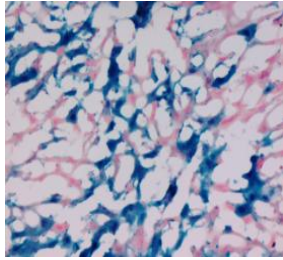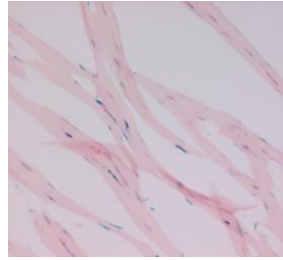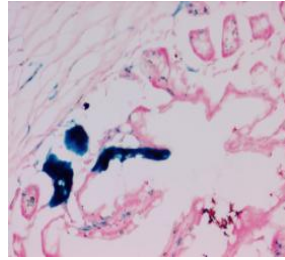

40X

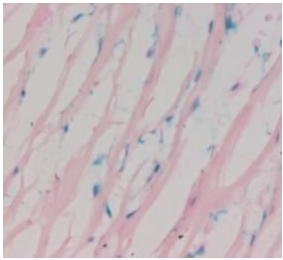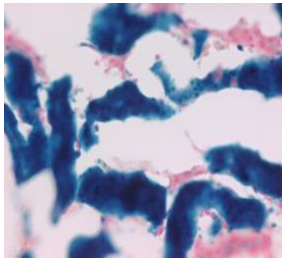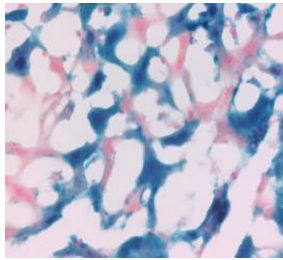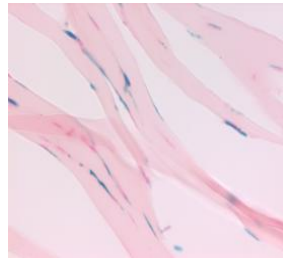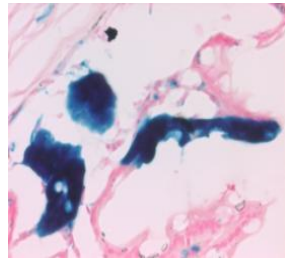

Testis

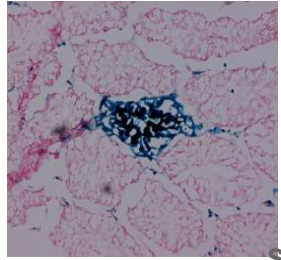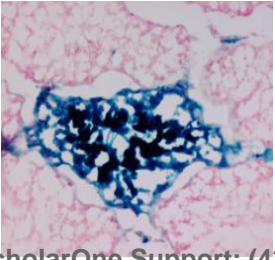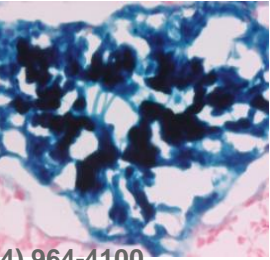

10X

20X

40X

# Suppl. Fig 7: 5903 Abcg2<sup>Cre/Cre</sup> Rosa26<sup>LacZ/LacZ</sup> – 15 mo post-Tam

1  
2  
3  
4  
5  
6  
7  
8  
9  
10  
11  
12  
13  
14  
15  
16  
17  
18  
19  
20  
21  
22  
23  
24  
25  
26  
27  
28  
29  
30  
31  
32  
33  
34  
35  
36  
37  
38  
39  
40  
41  
42  
43

Heart

Kidney

Liver

Skeletal muscle

Small intestine

10X

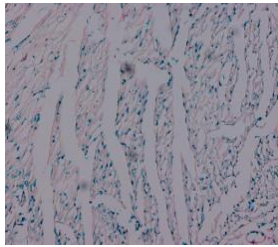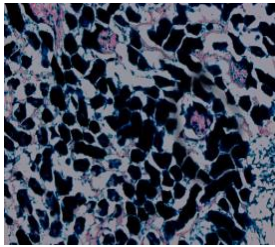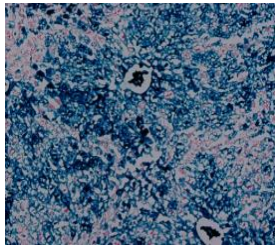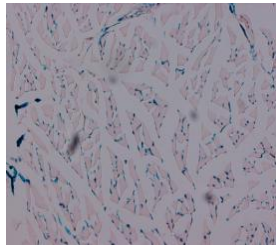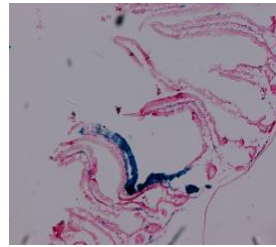

20X

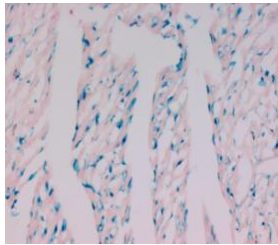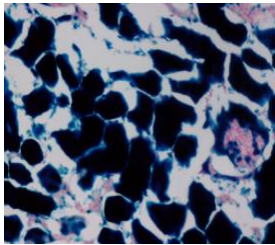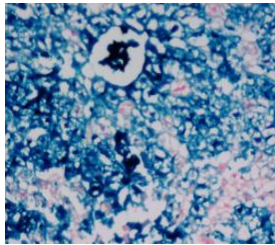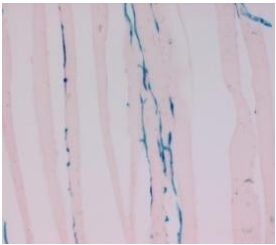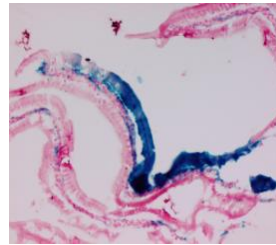

40X

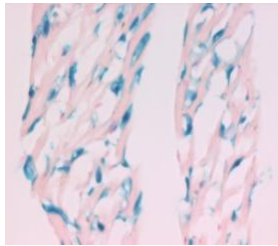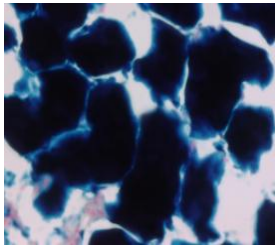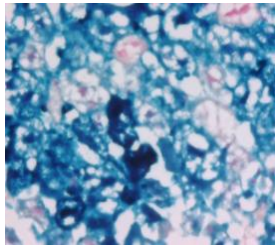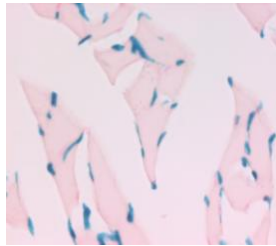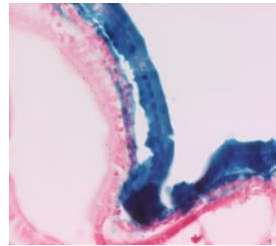

Testis

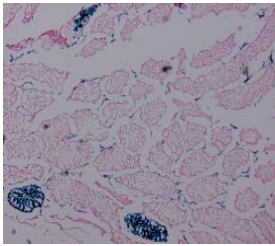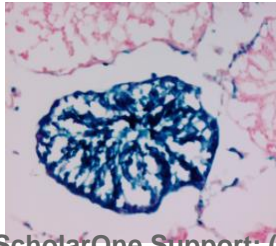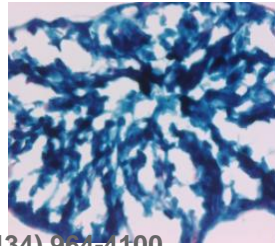

4X

20X

40X



Suppl. Fig 8: 2657  $Abcg2^{Cre/Cre}$  <sup>Stem Cells</sup>  $Rosa26^{LacZ/LacZ}$  -1.5 mo post-Tam

1  
2  
3  
4  
5  
6  
7  
8  
9  
10  
11  
12  
13  
14  
15  
16  
17  
18  
19  
20  
21  
22  
23  
24  
25  
26  
27  
28  
29  
30  
31  
32  
33  
34  
35  
36  
37  
38  
39  
40  
41  
42  
43

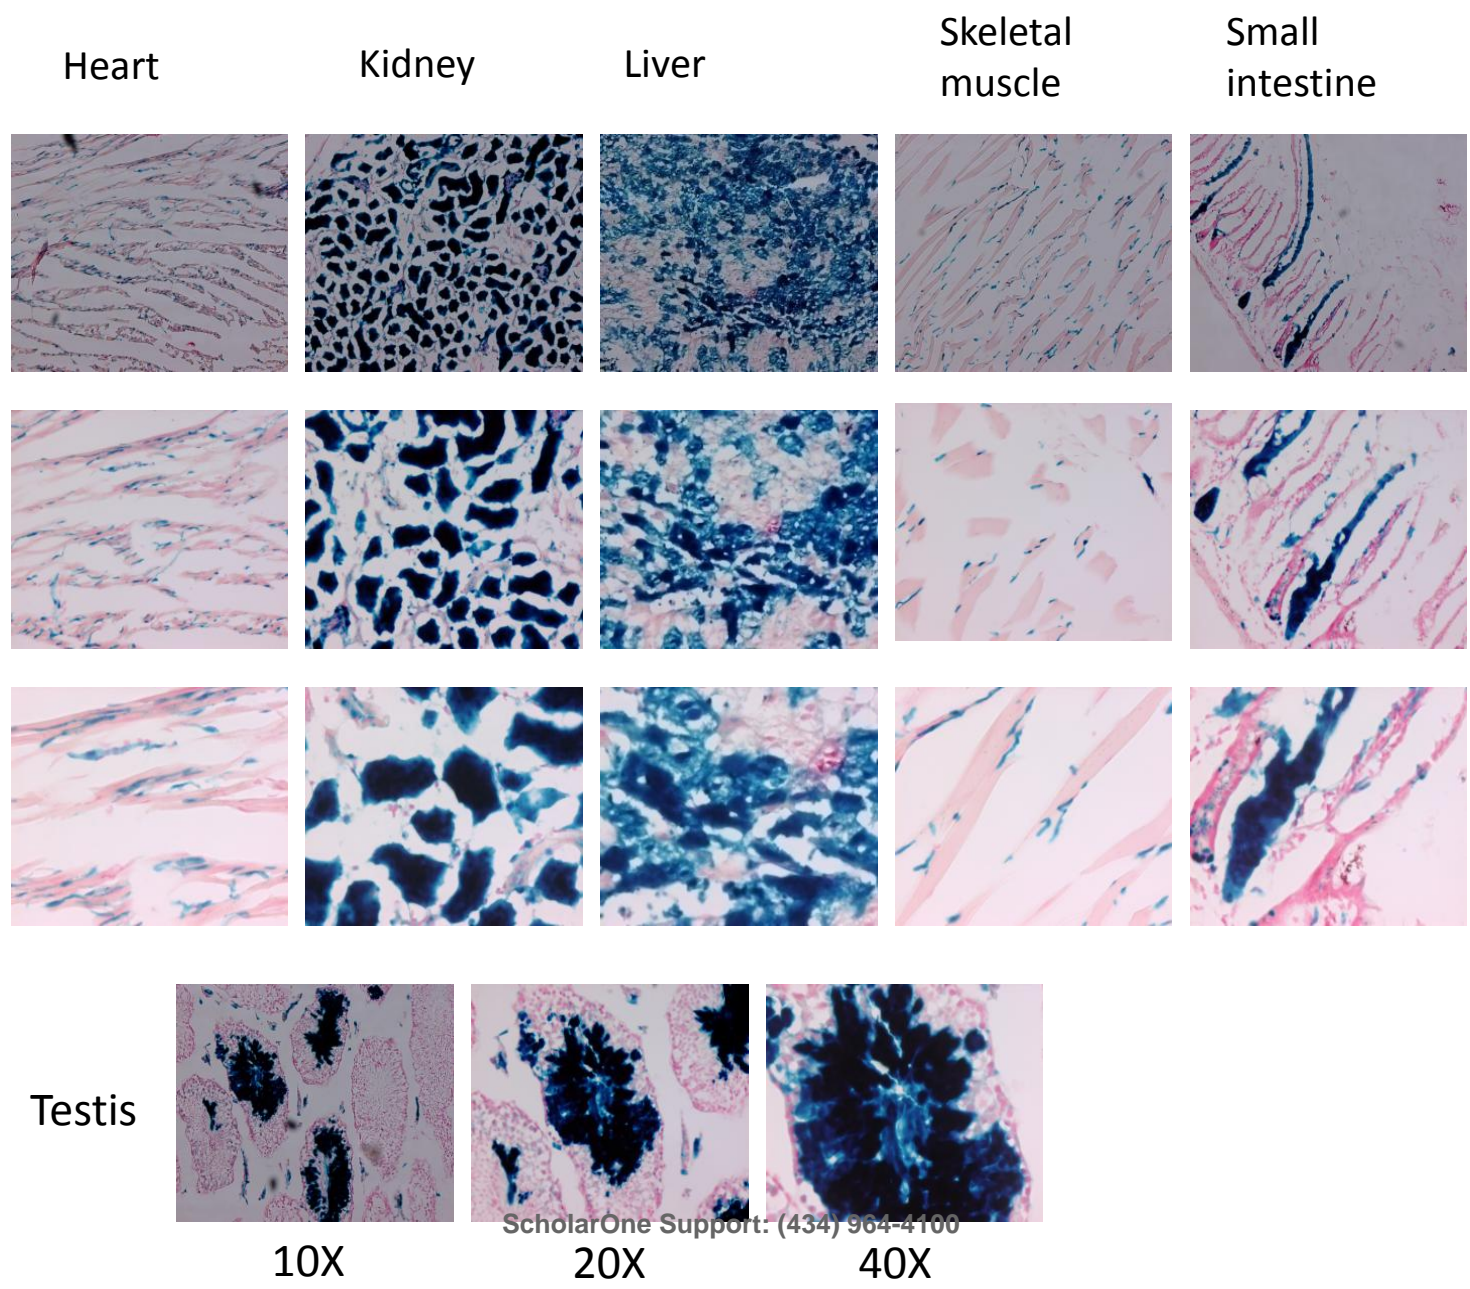



# Suppl. Fig 9: 2665 $Abcg2^{Cre/Cre}$ <sup>Stem Cells</sup> $Rosa26^{LacZ/LacZ}$ -1.5 mo post-Tam

1  
2  
3  
4  
5  
6  
7  
8  
9  
10  
11  
12  
13  
14  
15  
16  
17  
18  
19  
20  
21  
22  
23  
24  
25  
26  
27  
28  
29  
30  
31  
32  
33  
34  
35  
36  
37  
38  
39  
40  
41  
42  
43

Heart

Kidney

Liver

Skeletal muscle

Small intestine

10X

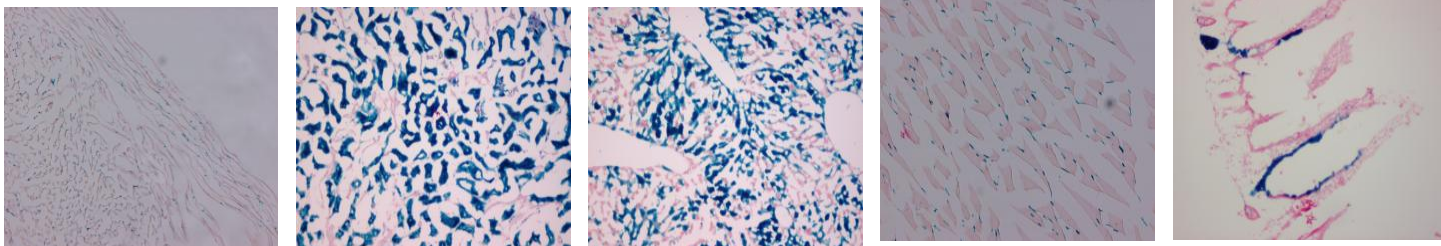

20X

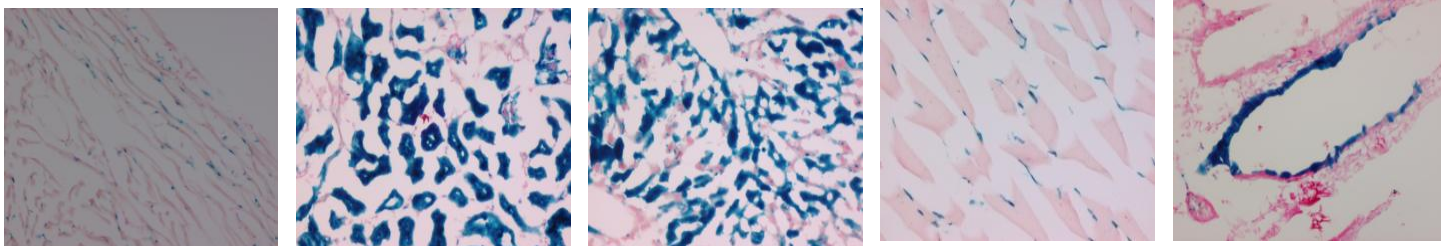

40X

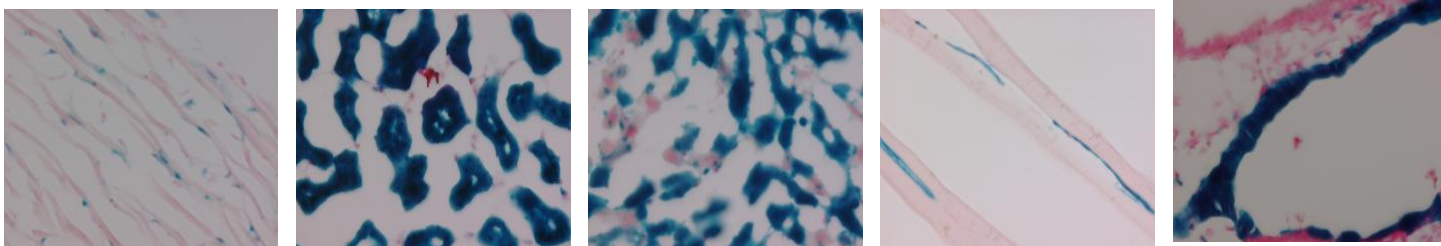

1  
2  
3 Suppl. Fig 10: Marking frequencies in SP and LSK populations  
4 of Tam treated mice.  
5  
6  
7  
8  
9

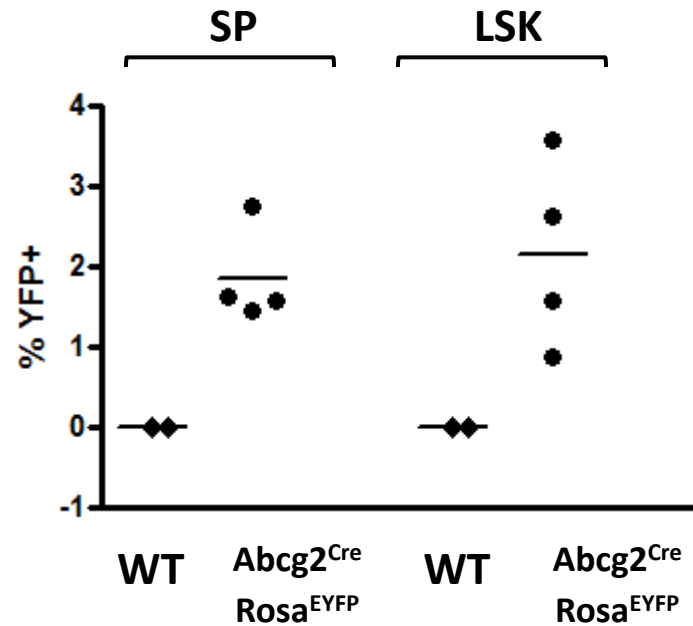

# Suppl. Fig 11: YFP is not detectable when an anti-YFP antibody is not used

5961 Abcg2Cre/+, 1 month after Tam, Skeletal Muscle

1  
2  
3  
4  
5  
6  
7  
8  
9  
10  
11  
12  
13  
14  
15  
16  
17  
18  
19  
20  
21  
22  
23  
24  
25  
26  
27  
28  
29  
30  
31  
32  
33  
34  
35  
36  
37  
38  
39  
40  
41  
42  
43

40X

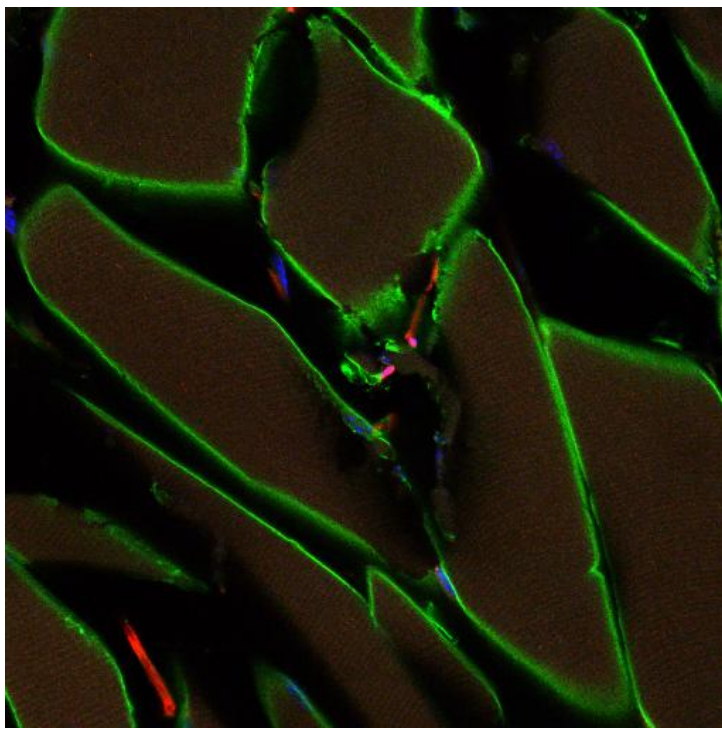

Laminin+GFP+DAPI

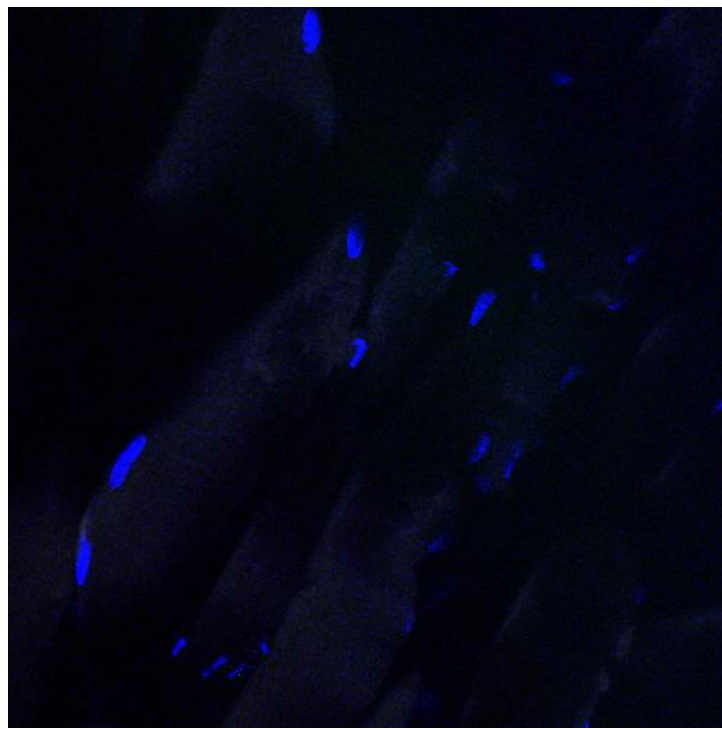

No Antibody+No Antibody+DAPI

Taken at identical microscope setting

Sections were stained using only DAPI and no other reagents or antibodies were used. Imaging was done using a 488 nm excitation laser as used figure 6C of the manuscript. This experiment demonstrates that there is no significant overlap from the Alexa488 (PECAM) and original YFP signals.
